# Supplementary material for: Preparation and Characterization of Polycarbonate-Based Blend System with Favorable Mechanical Properties and 3D Printing Performance
Source: MDPI journal article supplement (doi:10.3390/polym15204066), 2023-10-12
Supplement: s1 [file s1]

**Supporting Information**  
**Preparation and characterization of polycarbonate-based blend system with  
favorable mechanical properties and 3D printing performance**

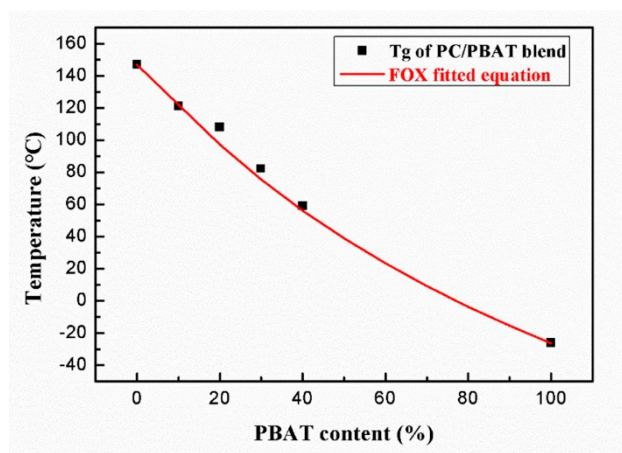

Figure S1.  $T_g$  values of the PC/PBAT blends and fitting curve according to the FOX equation

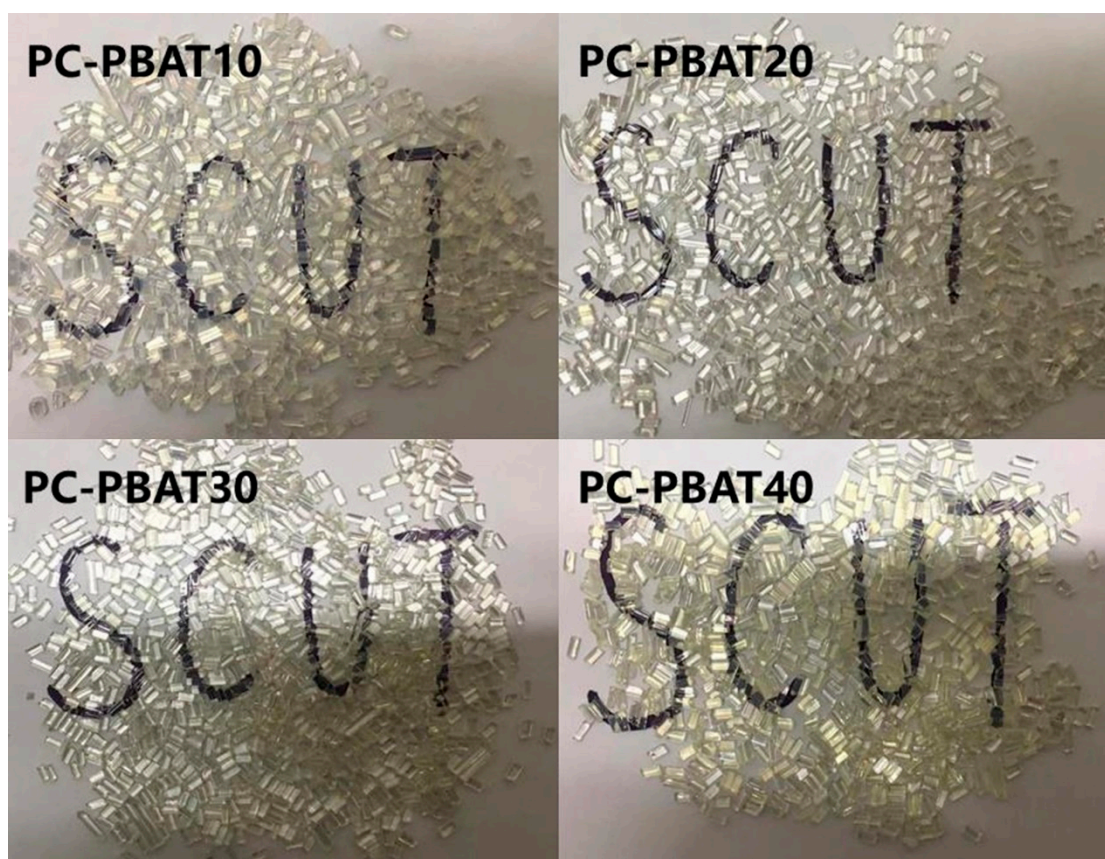

Figure S2. Digital photographs of the pelletized PC/PBAT blends
